# Supplementary material
Source: HighWire-hosted journal article supplement (https://bmjopen.bmj.com/content/12/3/e049162)
Supplement: inline-supplementary-material-1 [file inline-supplementary-material-1.pdf]

\_\_\_\_\_  
年 月

\_\_\_\_\_  
姓名： 编号：

# 血压日记

SIMPLE 高血压管理项目

童心堂

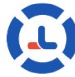

上海市第十人民医院  
SHANGHAI TENTH PEOPLE'S HOSPITAL  
同济大学附属第十人民医院  
TONGJI UNIVERSITY  
TENTH PEOPLES HOSPITAL OF TONGJI UNIVERSITY

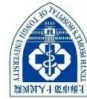

上海第十人民医院：上海市延长中路 301 号

在使用过程中，如您遇到问题，请咨询医生

## 第一周

| 测量日期        | 清晨/上午       |                     | 睡前/下午       |                     |
|-------------|-------------|---------------------|-------------|---------------------|
|             | 测量次数/时间     | 收缩压(高压) /舒张压(低压)/心率 | 测量次数/时间     | 收缩压(高压) /舒张压(低压)/心率 |
| ____年__月__日 | 第 1 次测量/__: | ____/____/____      | 第 1 次测量/__: | ____/____/____      |
|             | 第 2 次测量/__: | ____/____/____      | 第 2 次测量/__: | ____/____/____      |
| ____年__月__日 | 第 1 次测量/__: | ____/____/____      | 第 1 次测量/__: | ____/____/____      |
|             | 第 2 次测量/__: | ____/____/____      | 第 2 次测量/__: | ____/____/____      |
| ____年__月__日 | 第 1 次测量/__: | ____/____/____      | 第 1 次测量/__: | ____/____/____      |
|             | 第 2 次测量/__: | ____/____/____      | 第 2 次测量/__: | ____/____/____      |
| ____年__月__日 | 第 1 次测量/__: | ____/____/____      | 第 1 次测量/__: | ____/____/____      |
|             | 第 2 次测量/__: | ____/____/____      | 第 2 次测量/__: | ____/____/____      |
| ____年__月__日 | 第 1 次测量/__: | ____/____/____      | 第 1 次测量/__: | ____/____/____      |
|             | 第 2 次测量/__: | ____/____/____      | 第 2 次测量/__: | ____/____/____      |
| ____年__月__日 | 第 1 次测量/__: | ____/____/____      | 第 1 次测量/__: | ____/____/____      |
|             | 第 2 次测量/__: | ____/____/____      | 第 2 次测量/__: | ____/____/____      |
| ____年__月__日 | 第 1 次测量/__: | ____/____/____      | 第 1 次测量/__: | ____/____/____      |
|             | 第 2 次测量/__: | ____/____/____      | 第 2 次测量/__: | ____/____/____      |

## 第二周

| 测量日期        | 清晨/上午       |                     | 睡前/下午       |                     |
|-------------|-------------|---------------------|-------------|---------------------|
|             | 测量次数/时间     | 收缩压(高压) /舒张压(低压)/心率 | 测量次数/时间     | 收缩压(高压) /舒张压(低压)/心率 |
| ____年__月__日 | 第 1 次测量/__: | ____/____/____      | 第 1 次测量/__: | ____/____/____      |
|             | 第 2 次测量/__: | ____/____/____      | 第 2 次测量/__: | ____/____/____      |
| ____年__月__日 | 第 1 次测量/__: | ____/____/____      | 第 1 次测量/__: | ____/____/____      |
|             | 第 2 次测量/__: | ____/____/____      | 第 2 次测量/__: | ____/____/____      |
| ____年__月__日 | 第 1 次测量/__: | ____/____/____      | 第 1 次测量/__: | ____/____/____      |
|             | 第 2 次测量/__: | ____/____/____      | 第 2 次测量/__: | ____/____/____      |
| ____年__月__日 | 第 1 次测量/__: | ____/____/____      | 第 1 次测量/__: | ____/____/____      |
|             | 第 2 次测量/__: | ____/____/____      | 第 2 次测量/__: | ____/____/____      |
| ____年__月__日 | 第 1 次测量/__: | ____/____/____      | 第 1 次测量/__: | ____/____/____      |
|             | 第 2 次测量/__: | ____/____/____      | 第 2 次测量/__: | ____/____/____      |
| ____年__月__日 | 第 1 次测量/__: | ____/____/____      | 第 1 次测量/__: | ____/____/____      |
|             | 第 2 次测量/__: | ____/____/____      | 第 2 次测量/__: | ____/____/____      |
| ____年__月__日 | 第 1 次测量/__: | ____/____/____      | 第 1 次测量/__: | ____/____/____      |
|             | 第 2 次测量/__: | ____/____/____      | 第 2 次测量/__: | ____/____/____      |
