# Supplementary material
Source: HighWire-hosted journal article supplement (https://bmjopen.bmj.com/content/12/3/e049162)

- 综合看板
- 患者管理
- 所有患者
- 每日任务
- 患者招募
- 数据管理
- 快递管理

### 当前计划 查看参考

**当前阶段 13 天内平均血压**

2021-06-27 - 2021-07-10

上午(DBP/SBP)

下午(DBP/SBP)

67/128

64/121



T3

**目前服药方案** 更改服药计划

T3

---

### 历史计划

| 日期                      | DBP/SBP | 服药方案 |
|-------------------------|---------|------|
| 2021-06-28 - 至今         | 124/65  | T3   |
| 2021-06-14 - 2021-06-28 | 125/67  | T3   |
| 2021-05-31 - 2021-06-14 | 124/67  | T3   |
| 2021-05-17 - 2021-05-31 | 127/67  | T3   |
| 2021-04-22 - 2021-05-17 | 130/68  | T3   |

- 综合看板
- 患者管理
- 所有患者
- 每日任务
- 患者招募
- 数据管理
- 快递管理

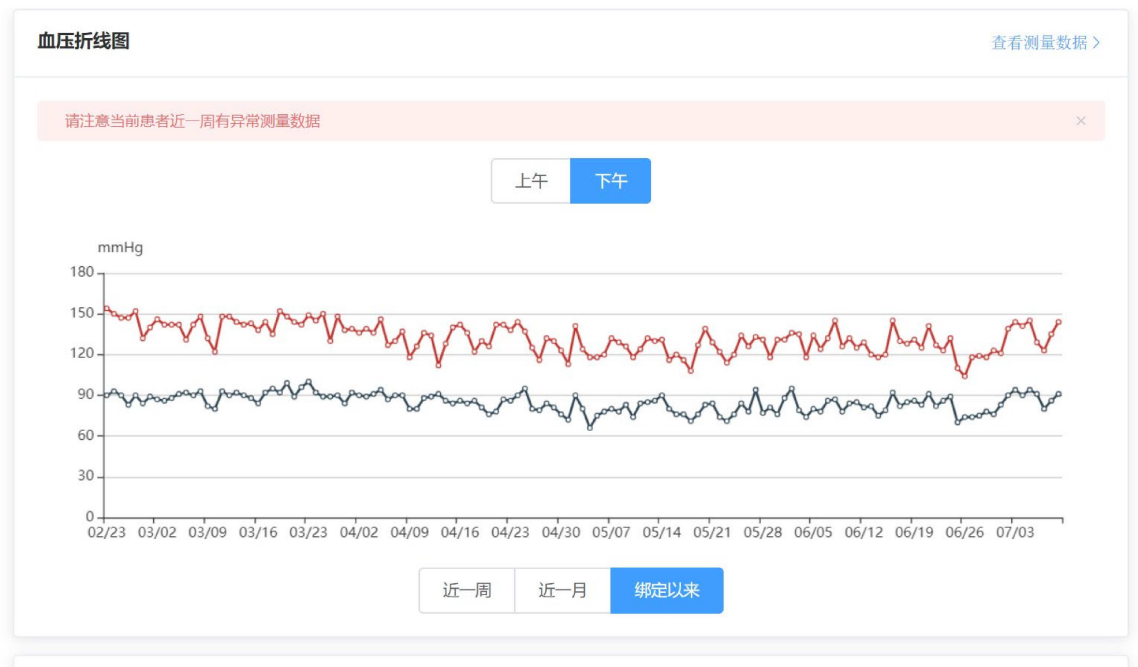

- 综合看板
- 患者管理
- 所有患者
- 每日任务
- 患者招募
- 数据管理
- 快递管理

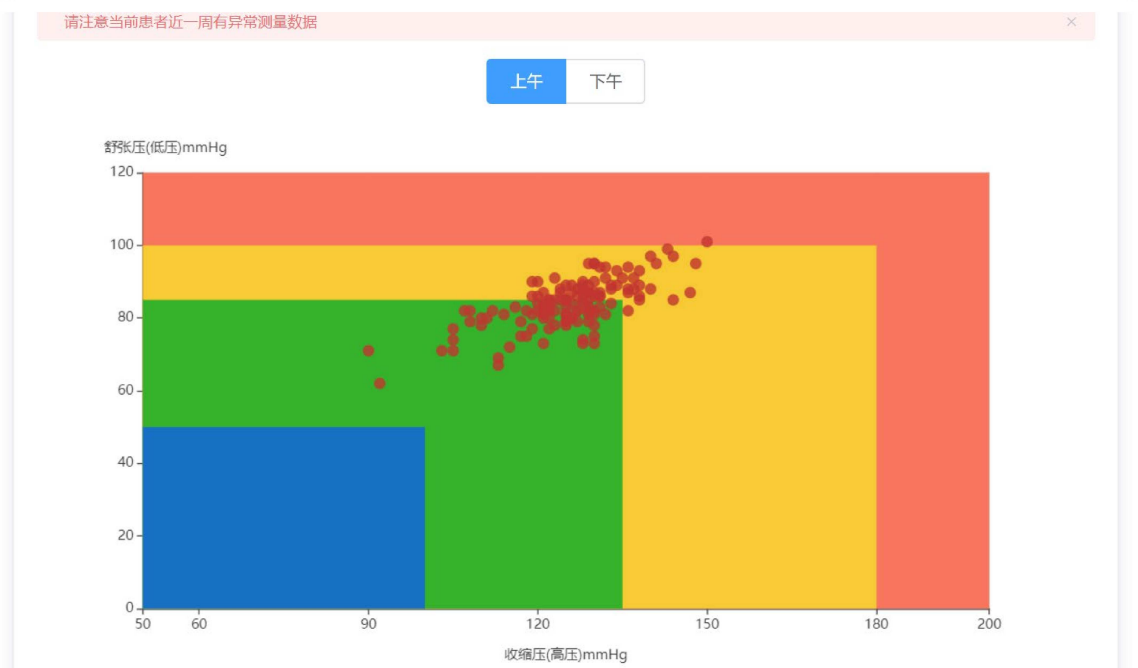

Supplement: inline-supplementary-material-3 [file inline-supplementary-material-3.pdf]
